# Supplementary material
Source: MDPI journal article supplement (https://www.mdpi.com/1424-2818/15/10/1092)
Supplement: s1 [file s1]

**Supplementary Table:****Supplementary Table S1.** Statistics of 16S rRNA amplicon sequences in root-nodule samples of different groups.

| Group | Sample | Raw CCS | Clean CCS | Denoised CCS | Non-chimeric CCS |
|-------|--------|---------|-----------|--------------|------------------|
| MMDB  | MM01   | 10870   | 10840     | 10702        | 10597            |
|       | MM02   | 10545   | 10514     | 10360        | 10246            |
|       | MM03   | 14606   | 14574     | 14259        | 14093            |
| YJYC  | YC01   | 12405   | 12372     | 12121        | 12101            |
| JMEP  | JM01   | 11868   | 11846     | 11822        | 11502            |
| ZQSH  | ZQ01   | 12550   | 12519     | 12303        | 12284            |
| GZTH  | GZ01   | 12277   | 12275     | 12123        | 12047            |
|       | GZ02   | 13112   | 13111     | 13076        | 13040            |
|       | GZ03   | 11768   | 11747     | 11665        | 11541            |
|       | GZ04   | 11185   | 11154     | 11043        | 10910            |
|       | GZ05   | 8398    | 8381      | 8320         | 8310             |
|       | GZ06   | 12017   | 11970     | 11874        | 11851            |
|       | M1     | 13022   | 13017     | 12815        | 12777            |
|       | M2     | 13012   | 13006     | 12724        | 12686            |
|       | M3     | 12938   | 12917     | 12573        | 12493            |
|       | M4     | 12962   | 12954     | 12803        | 12784            |
|       | M5     | 11901   | 11894     | 11765        | 11733            |
|       | M6     | 13045   | 13029     | 12839        | 12805            |
|       | T1     | 12570   | 12560     | 12470        | 12375            |
|       | T2     | 12965   | 12960     | 12921        | 12876            |
|       | T3     | 12912   | 12872     | 12740        | 12671            |
| GZZC  | GZ07   | 12125   | 12108     | 11799        | 11703            |
|       | GZ08   | 12309   | 12269     | 12067        | 11878            |
|       | GZ09   | 11725   | 11681     | 11488        | 11387            |
| HZBL  | HZ01   | 13946   | 13919     | 13846        | 13838            |
|       | HZ02   | 12678   | 12677     | 11190        | 8852             |
|       | HZ03   | 13427   | 13423     | 13222        | 13135            |
|       | HZ04   | 11940   | 11940     | 11885        | 11814            |
|       | HZ05   | 14803   | 14803     | 14597        | 14442            |
| HZHD  | HD01   | 10793   | 10774     | 10641        | 10628            |
| CZRP  | RP01   | 13380   | 13376     | 13258        | 13237            |
